# Supplementary material for: Carotenoid biosynthesis genes LcLCYB, LcLCYE, and LcBCH from wolfberry confer increased carotenoid content and improved salt tolerance in tobacco
Source: Springer Nature journal article supplement (doi:10.1038/s41598-024-60848-3), 2024-05-08
Supplement: 41598_2024_60848_MOESM1_ESM.pdf [file 41598_2024_60848_MOESM1_ESM.pdf]

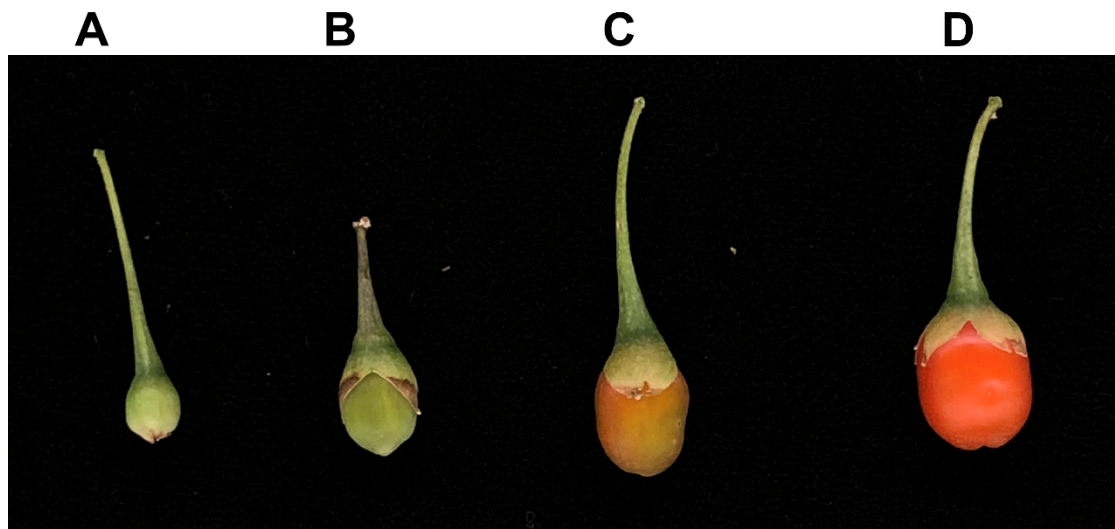

**Supplementary Figure 1.** Different ripening stages of wolfberry fruits. The genes were isolated from the stage (D), the red ripened fruits.

|           |                                                                                                                                                                                                                              |                                                                                   |     |
|-----------|------------------------------------------------------------------------------------------------------------------------------------------------------------------------------------------------------------------------------|-----------------------------------------------------------------------------------|-----|
| LcLCYB    | ... MDTLLKTPNKLKLEFLPQHGFVSVKSNFTSVKPK ...                                                                                                                                                                                   | KFGSR KSCENMGRK VCVARNSSSTLLEVPETKRELDPEFLMVDPTKGLAVDIAVGGGPAGLAVACQVSAGLSVCSIDFS | 116 |
| AtLCYB    | ... MDTLLKTPNKLKLEFLPQHGFVSVKSNFTSVKPK ...                                                                                                                                                                                   | VRIQVKKRAIKIVSSV ... VSGSAALDVPETKRELDPEFLMVDPTKGLAVDIAVGGGPAGLAVACQVSAGLSVCSIDFS | 114 |
| CaLCYB    | ... MDIWPRTNKLKLEFLPQHGFVSVKSNFTSVKPK ...                                                                                                                                                                                    | KFGFRNFRSGMGRG VCVKAS SSTLLEVPETKRELDPEFLMVDPTKGLAVDIAVGGGPAGLAVACQVSAGLSVCSIDFS  | 116 |
| CaLCYB    | ... MDTLLRINIKYQFLPQHGFVSVKSNFTSVKPK ...                                                                                                                                                                                     | KSRILKIKKQ QGVGVK SSALDVPETKRELDPEFLMVDPTKGLAVDIAVGGGPAGLAVACQVSAGLSVCSIDFS       | 119 |
| CaLCYB    | ... MDTLLKTPNKLKLEFLPQHGFVSVKSNFTSVKPK ...                                                                                                                                                                                   | PTRALVCR4AAAG ... EALRSALPPTRPETLSLDLIRVDPAPARVDIAVGGGPAGLAVACQVSAGLSVCSIDFS      | 99  |
| EsLCYB    | ... MDTLLKTPNKLKLEFLPQHGFVSVKSNFTSVKPK ...                                                                                                                                                                                   | VKLGVKRAIKI OGS ... SSSALDVPETKRELDPEFLMVDPTKGLAVDIAVGGGPAGLAVACQVSAGLSVCSIDFS    | 112 |
| GmLCYB    | MI P MDTLLKTPNKLKLEFLPQHGFVSVKSNFTSVKPK ...                                                                                                                                                                                  | KPI VYWGIC ONLIRAS SSALDVPETKRELDPEFLMVDPTKGLAVDIAVGGGPAGLAVACQVSAGLSVCSIDFS      | 122 |
| LsLCYB    | ... MDSLRLTHSSPEFLHAI NRFAGNATLSSSKSQI HETRFPPK ...                                                                                                                                                                          | KPHLKWGHGCOVKAS SSALDVPETKRELDPEFLMVDPTKGLAVDIAVGGGPAGLAVACQVSAGLSVCSIDFS         | 120 |
| NtLCYB    | ... MDTLLKTPNKLKLEFLPQHGFVSVKSNFTSVKPK ...                                                                                                                                                                                   | KFGSR KICENMGRG VCVKAK SSALDVPETKRELDPEFLMVDPTKGLAVDIAVGGGPAGLAVACQVSAGLSVCSIDFS  | 115 |
| OsLCYB    | ... MDTLLKTPNKLKLEFLPQHGFVSVKSNFTSVKPK ...                                                                                                                                                                                   | PTRALVCR4AAAG ... EALRSALPPTRPETLSLDLIRVDPAPARVDIAVGGGPAGLAVACQVSAGLSVCSIDFS      | 99  |
| SILCYB    | ... MDTLLKTPNKLKLEFLPQHGFVSVKSNFTSVKPK ...                                                                                                                                                                                   | KFCENMGRG VCVKAK SSTLLEVPETKRELDPEFLMVDPTKGLAVDIAVGGGPAGLAVACQVSAGLSVCSIDFS       | 115 |
| SILCYB    | ... MDI LKTPNKLKLEFLPQHGFVSVKSNFTSVKPK ...                                                                                                                                                                                   | KFCENMGRG VCVKAK SSTLLEVPETKRELDPEFLMVDPTKGLAVDIAVGGGPAGLAVACQVSAGLSVCSIDFS       | 115 |
| VvLCYB    | ... MDTLLKTPNKLKLEFLPQHGFVSVKSNFTSVKPK ...                                                                                                                                                                                   | KFCENMGRG VCVKAK SSTLLEVPETKRELDPEFLMVDPTKGLAVDIAVGGGPAGLAVACQVSAGLSVCSIDFS       | 119 |
| ZmLCYB    | ... MDTLLKTPNKLKLEFLPQHGFVSVKSNFTSVKPK ...                                                                                                                                                                                   | KFCENMGRG VCVKAK SSTLLEVPETKRELDPEFLMVDPTKGLAVDIAVGGGPAGLAVACQVSAGLSVCSIDFS       | 99  |
| Consensus | ..... MATTALLLRTHHPCPKPAPRASVLCR .....                                                                                                                                                                                       | ..... ATAGMAGPASA .....                                                           |     |
|           |                                                                                                                                                                                                                              | l p e l p d v d l v g g g p g l a v a q v a g l v i d p                           |     |
| LcLCYB    | PKLIWPNNYGVWDFEAMLDLCLATWSGAVYVDDDRMRLDRPYGRVNRGLKLSAMQKQLLNGVGFHARVVKVIFEEASMLICSDGVITICAVVLDTATGFSRGLVGYDRIPNYQV                                                                                                           | 240                                                                               |     |
| AtLCYB    | PKLIWPNNYGVWDFEAMLDLCLATWSGAVYVDEGVRRDRPYGRVNRGLKLSAMQKQLLNGVGFHARVVKVIFEEASMLICSDGVITICAVVLDTATGFSRGLVGYDRIPNYQV                                                                                                            | 238                                                                               |     |
| CaLCYB    | PKLIWPNNYGVWDFEAMLDLCLATWSGAVYVDDDRMRLDRPYGRVNRGLKLSAMQKQLLNGVGFHARVVKVIFEEASMLICSDGVITICAVVLDTATGFSRGLVGYDRIPNYQV                                                                                                           | 240                                                                               |     |
| CaLCYB    | PKLIWPNNYGVWDFEAMLDLCLATWSGAVYV TNEQSTRDARPYGRVNRGLKLSAMQKQLLNGVGFHARVVKVIFEEASMLICSDGVITICAVVLDTATGFSRGLVGYDRIPNYQV                                                                                                         | 243                                                                               |     |
| CaLCYB    | PKLIWPNNYGVWDFEAMLDLCLATWSGAVYV I DDTNTTRDARPYGRVNRGLKLSAMQKQLLNGVGFHARVVKVIFEEASMLICSDGVITICAVVLDTATGFSRGLVGYDRIPNYQV                                                                                                       | 243                                                                               |     |
| EsLCYB    | PKLIWPNNYGVWDFEAMLDLCLATWSGAVYV I DDOYTRDARPYGRVNRGLKLSAMQKQLLNGVGFHARVVKVIFEEASMLICSDGVITICAVVLDTATGFSRGLVGYDRIPNYQV                                                                                                        | 236                                                                               |     |
| GmLCYB    | PKLIWPNNYGVWDFEAMLDLCLATWSGAVYV I DDKTRDARPYGRVNRGLKLSAMQKQLLNGVGFHARVVKVIFEEASMLICSDGVITICAVVLDTATGFSRGLVGYDRIPNYQV                                                                                                         | 246                                                                               |     |
| LsLCYB    | PKLIWPNNYGVWDFEAMLDLCLATWSGAVYV I NENSIPNDRPYGRVNRGLKLSAMQKQLLNGVGFHARVVKVIFEEASMLICSDGVITICAVVLDTATGFSRGLVGYDRIPNYQV                                                                                                        | 244                                                                               |     |
| NtLCYB    | PKLIWPNNYGVWDFEAMLDLCLATWSGAVYV I DDTNTTRDARPYGRVNRGLKLSAMQKQLLNGVGFHARVVKVIFEEASMLICSDGVITICAVVLDTATGFSRGLVGYDRIPNYQV                                                                                                       | 239                                                                               |     |
| OsLCYB    | PKLIWPNNYGVWDFEAMLDLCLATWSGAVYV I DDTNTTRDARPYGRVNRGLKLSAMQKQLLNGVGFHARVVKVIFEEASMLICSDGVITICAVVLDTATGFSRGLVGYDRIPNYQV                                                                                                       | 224                                                                               |     |
| SILCYB    | PKLIWPNNYGVWDFEAMLDLCLATWSGAVYV VDDDRMRLDRPYGRVNRGLKLSAMQKQLLNGVGFHARVVKVIFEEASMLICSDGVITICAVVLDTATGFSRGLVGYDRIPNYQV                                                                                                         | 239                                                                               |     |
| SILCYB    | PKLIWPNNYGVWDFEAMLDLCLATWSGAVYV VDDDRMRLDRPYGRVNRGLKLSAMQKQLLNGVGFHARVVKVIFEEASMLICSDGVITICAVVLDTATGFSRGLVGYDRIPNYQV                                                                                                         | 239                                                                               |     |
| VvLCYB    | PKLIWPNNYGVWDFEAMLDLCLATWSGAVYV I DDOYTRDARPYGRVNRGLKLSAMQKQLLNGVGFHARVVKVIFEEASMLICSDGVITICAVVLDTATGFSRGLVGYDRIPNYQV                                                                                                        | 243                                                                               |     |
| ZmLCYB    | PAVVWPNNYGVWDFEAMLDLCLATWSGAVYV I DDOYTRDARPYGRVNRGLKLSAMQKQLLNGVGFHARVVKVIFEEASMLICSDGVITICAVVLDTATGFSRGLVGYDRIPNYQV                                                                                                        | 223                                                                               |     |
| Consensus | p wpnnnygvwdf eam l d cl d w s g a v y v d d d r m r l d r p y g r v n r g l k l s a m q k q l l n g v g f h a r v v k v i f e e a s m l i c s d g v i t i c a v v l d t a t g f s r g l v g y d r i p n y q v               |                                                                                   |     |
| LcLCYB    | AYCI LADVEHPFDITKLVMDWRDHI NNDELKER SRVPTLYAAPPSSNRI FLEETSIVARPGAMDQI QERMAARLRHLQI NKRRI EEDERCIPMAGGLPVPVQRVVI GGTIAGVHFS                                                                                                 | 365                                                                               |     |
| AtLCYB    | AYCI LADVEHPFDITKLVMDWRDHI NNDELKER SRVPTLYAAPPSSNRI FLEETSIVARPGAMDQI QERMAARLRHLQI NKRRI EEDERCIPMAGGLPVPVQRVVI GGTIAGVHFS                                                                                                 | 363                                                                               |     |
| CaLCYB    | AYCI LADVEHPFDITKLVMDWRDHI NNDELKER SRVPTLYAAPPSSNRI FLEETSIVARPGAMDQI QERMAARLRHLQI NKRRI EEDERCIPMAGGLPVPVQRVVI GGTIAGVHFS                                                                                                 | 365                                                                               |     |
| CaLCYB    | AYCI LADVEHPFDITKLVMDWRDHI NNDELKER SRVPTLYAAPPSSNRI FLEETSIVARPGAMDQI QERMAARLRHLQI NKRRI EEDERCIPMAGGLPVPVQRVVI GGTIAGVHFS                                                                                                 | 368                                                                               |     |
| CaLCYB    | AYCI LADVEHPFDITKLVMDWRDHI NNDELKER SRVPTLYAAPPSSNRI FLEETSIVARPGAMDQI QERMAARLRHLQI NKRRI EEDERCIPMAGGLPVPVQRVVI GGTIAGVHFS                                                                                                 | 368                                                                               |     |
| EsLCYB    | AYCI LADVEHPFDITKLVMDWRDHI NNDELKER SRVPTLYAAPPSSNRI FLEETSIVARPGAMDQI QERMAARLRHLQI NKRRI EEDERCIPMAGGLPVPVQRVVI GGTIAGVHFS                                                                                                 | 361                                                                               |     |
| GmLCYB    | AYCI LADVEHPFDITKLVMDWRDHI NNDELKER SRVPTLYAAPPSSNRI FLEETSIVARPGAMDQI QERMAARLRHLQI NKRRI EEDERCIPMAGGLPVPVQRVVI GGTIAGVHFS                                                                                                 | 371                                                                               |     |
| LsLCYB    | AYCI LADVEHPFDITKLVMDWRDHI NNDELKER SRVPTLYAAPPSSNRI FLEETSIVARPGAMDQI QERMAARLRHLQI NKRRI EEDERCIPMAGGLPVPVQRVVI GGTIAGVHFS                                                                                                 | 369                                                                               |     |
| NtLCYB    | AYCI LADVEHPFDITKLVMDWRDHI NNDELKER SRVPTLYAAPPSSNRI FLEETSIVARPGAMDQI QERMAARLRHLQI NKRRI EEDERCIPMAGGLPVPVQRVVI GGTIAGVHFS                                                                                                 | 364                                                                               |     |
| OsLCYB    | AYCI LADVEHPFDITKLVMDWRDHI NNDELKER SRVPTLYAAPPSSNRI FLEETSIVARPGAMDQI QERMAARLRHLQI NKRRI EEDERCIPMAGGLPVPVQRVVI GGTIAGVHFS                                                                                                 | 349                                                                               |     |
| SILCYB    | AYCI LADVEHPFDITKLVMDWRDHI NNDELKER SRVPTLYAAPPSSNRI FLEETSIVARPGAMDQI QERMAARLRHLQI NKRRI EEDERCIPMAGGLPVPVQRVVI GGTIAGVHFS                                                                                                 | 364                                                                               |     |
| SILCYB    | AYCI LADVEHPFDITKLVMDWRDHI NNDELKER SRVPTLYAAPPSSNRI FLEETSIVARPGAMDQI QERMAARLRHLQI NKRRI EEDERCIPMAGGLPVPVQRVVI GGTIAGVHFS                                                                                                 | 364                                                                               |     |
| VvLCYB    | AYCI LADVEHPFDITKLVMDWRDHI NNDELKER SRVPTLYAAPPSSNRI FLEETSIVARPGAMDQI QERMAARLRHLQI NKRRI EEDERCIPMAGGLPVPVQRVVI GGTIAGVHFS                                                                                                 | 368                                                                               |     |
| ZmLCYB    | AYCI LADVEHPFDITKLVMDWRDHI NNDELKER SRVPTLYAAPPSSNRI FLEETSIVARPGAMDQI QERMAARLRHLQI NKRRI EEDERCIPMAGGLPVPVQRVVI GGTIAGVHFS                                                                                                 | 348                                                                               |     |
| Consensus | aygi a v h p f d i t k l v m d w r d h i n n d e l k e r s r v p t l y a a p p s s n r i f l e e t s i v a r p g a m d q i q e r m a a r l r h l q i n k r r i e e d e r c i p m a g g l p v p q r v v i g g t i a g v h f s |                                                                                   |     |
| LcLCYB    | TOYVARTLAAAPVADAVI VQVGS EKN ... HL NDL ASVWR LWP                                                                                                                                                                            | RRRRQREFFCFGMD LLKLDL PATRRFFDAFFDI ERYWHGLSSRL LPLEIFGLSIFSLASNSRDI I MFG        | 485 |
| AtLCYB    | TOYVARTLAAAPVADAVI VQVGS EKN ... NSLR DQL AEVWR LWP                                                                                                                                                                          | RRRRQREFFCFGMD LLKLDL PATRRFFDAFFDI ERYWHGLSSRL LPLEIFGLSIFSLASNSRDI I MFG        | 485 |
| CaLCYB    | TOYVARTLAAAPVADAVI VQVGS EKN ... HL NDL ASVWR LWP                                                                                                                                                                            | RRRRQREFFCFGMD LLKLDL PATRRFFDAFFDI ERYWHGLSSRL LPLEIFGLSIFSLASNSRDI I MFG        | 485 |
| CaLCYB    | TOYVARTLAAAPVADAVI VQVGS DGR ... FGDAL SEVWR LWP                                                                                                                                                                             | RRRRQREFFCFGMD LLKLDL PATRRFFDAFFDI ERYWHGLSSRL LPLEIFGLSIFSLASNSRDI I MFG        | 488 |
| CaLCYB    | TOYVARTLAAAPVADAVI VQVGS DRS ... I S EHL AEVWR LWP                                                                                                                                                                           | RRRRQREFFCFGMD LLKLDL PATRRFFDAFFDI ERYWHGLSSRL LPLEIFGLSIFSLASNSRDI I MFG        | 488 |
| EsLCYB    | TOYVARTLAAAPVADAVI VQVGS SSK ... NSLR DQL AEVWR LWP                                                                                                                                                                          | RRRRQREFFCFGMD LLKLDL PATRRFFDAFFDI ERYWHGLSSRL LPLEIFGLSIFSLASNSRDI I MFG        | 484 |
| GmLCYB    | TOYVARTLAAAPVADAVI VQVGS DRC ... FS QETS AEVWR LWP                                                                                                                                                                           | RRRRQREFFCFGMD LLKLDL PATRRFFDAFFDI ERYWHGLSSRL LPLEIFGLSIFSLASNSRDI I MFG        | 491 |
| LsLCYB    | TOYVARTLAAAPVADAVI VQVGS EKT ... VS TDL AGI WR LWP                                                                                                                                                                           | RRRRQREFFCFGMD LLKLDL PATRRFFDAFFDI ERYWHGLSSRL LPLEIFGLSIFSLASNSRDI I MFG        | 489 |
| NtLCYB    | TOYVARTLAAAPVADAVI VQVGS EKD ... LL NDL AEVWR LWP                                                                                                                                                                            | RRRRQREFFCFGMD LLKLDL PATRRFFDAFFDI ERYWHGLSSRL LPLEIFGLSIFSLASNSRDI I MFG        | 484 |
| OsLCYB    | TOYVARTLAAAPVADAVI VQVGS DGD ... SAFA DAL AEVWR LWP                                                                                                                                                                          | RRRRQREFFCFGMD LLKLDL PATRRFFDAFFDI ERYWHGLSSRL LPLEIFGLSIFSLASNSRDI I MFG        | 472 |
| SILCYB    | TOYVARTLAAAPVADAVI VQVGS DKD ... HL NDL ASVWR LWP                                                                                                                                                                            | RRRRQREFFCFGMD LLKLDL PATRRFFDAFFDI ERYWHGLSSRL LPLEIFGLSIFSLASNSRDI I MFG        | 484 |
| SILCYB    | TOYVARTLAAAPVADAVI VQVGS DKD ... HL NDL ASVWR LWP                                                                                                                                                                            | RRRRQREFFCFGMD LLKLDL PATRRFFDAFFDI ERYWHGLSSRL LPLEIFGLSIFSLASNSRDI I MFG        | 484 |
| VvLCYB    | TOYVARTLAAAPVADAVI VQVGS DRC ... FS QETS AEVWR LWP                                                                                                                                                                           | RRRRQREFFCFGMD LLKLDL PATRRFFDAFFDI ERYWHGLSSRL LPLEIFGLSIFSLASNSRDI I MFG        | 483 |
| ZmLCYB    | TOYVARTLAAAPVADAVI VQVGS DRC ... FS QETS AEVWR LWP                                                                                                                                                                           | RRRRQREFFCFGMD LLKLDL PATRRFFDAFFDI ERYWHGLSSRL LPLEIFGLSIFSLASNSRDI I MFG        | 488 |
| Consensus | t g y v a r t l a a a p v a d a v i v q v g s e k n g l n d l a s v w r l w p r r r r q r e f f c f g m d l l k l d l p a t r r f f d a f f d i e r y w h g l s s r l l p l e i f g l s i f s l a s n s r d i i m f g        |                                                                                   |     |
| LcLCYB    | TLFVVMNINLQDRE                                                                                                                                                                                                               | 501                                                                               |     |
| AtLCYB    | TLFVVMNINLQDRD                                                                                                                                                                                                               | 501                                                                               |     |
| CaLCYB    | TLFVVMNINLQDRD                                                                                                                                                                                                               | 499                                                                               |     |
| CaLCYB    | TLFVVMNINLQDRD                                                                                                                                                                                                               | 504                                                                               |     |
| CaLCYB    | TLFVVMNINLQDRD                                                                                                                                                                                                               | 504                                                                               |     |
| EsLCYB    | TLFVVMNINLQDRD                                                                                                                                                                                                               | 500                                                                               |     |
| GmLCYB    | TLFVVMNINLQDRE                                                                                                                                                                                                               | 507                                                                               |     |
| LsLCYB    | TLFVVMNINLQDRE                                                                                                                                                                                                               | 505                                                                               |     |
| NtLCYB    | TLFVVMNINLQDRE                                                                                                                                                                                                               | 500                                                                               |     |
| OsLCYB    | TLFVVMNINLQDRD                                                                                                                                                                                                               | 489                                                                               |     |
| SILCYB    | TLFVVMNINLQDRE                                                                                                                                                                                                               | 500                                                                               |     |
| SILCYB    | TLFVVMNINLQDRE                                                                                                                                                                                                               | 500                                                                               |     |
| VvLCYB    | TLFVVMNINLQDRE                                                                                                                                                                                                               | 504                                                                               |     |
| ZmLCYB    | TLFVVMNINLQDRG                                                                                                                                                                                                               | 490                                                                               |     |
| Consensus | t l f v v m n i n l q d r e                                                                                                                                                                                                  |                                                                                   |     |

**Supplementary Figure 2.** Multiple sequence alignments of LcLCYB with the selected corresponding proteins. AtLCYB (*Arabidopsis thaliana*, NP\_187634), CaLCYB (*Capsicum annuum*, PHT71462), CsaLCYB (*Cucumis sativus*, XP\_004150761), CsiLCYB (*Citrus sinensis*, AAM21152), EsLCYB (*Eutrema salsugineum*, XP\_006407592), GmLCYB (*Glycine max*, XP\_003554132), LsLCYB (*Lactuca sativa*, XP\_023755637), NtLCYB (*Nicotiana tabacum*, NP\_001311716), OsLCYB (*Oryza sativa*, XP\_015627234), SILCYB (*Solanum lycopersicum*, XP\_010312096), SlLCYB (*Solanum tuberosum*, XP\_006351264), VvLCYB (*Vitis vinifera*, XP\_002275769) and ZmLCYB (*Zea mays*, NP\_001169155).







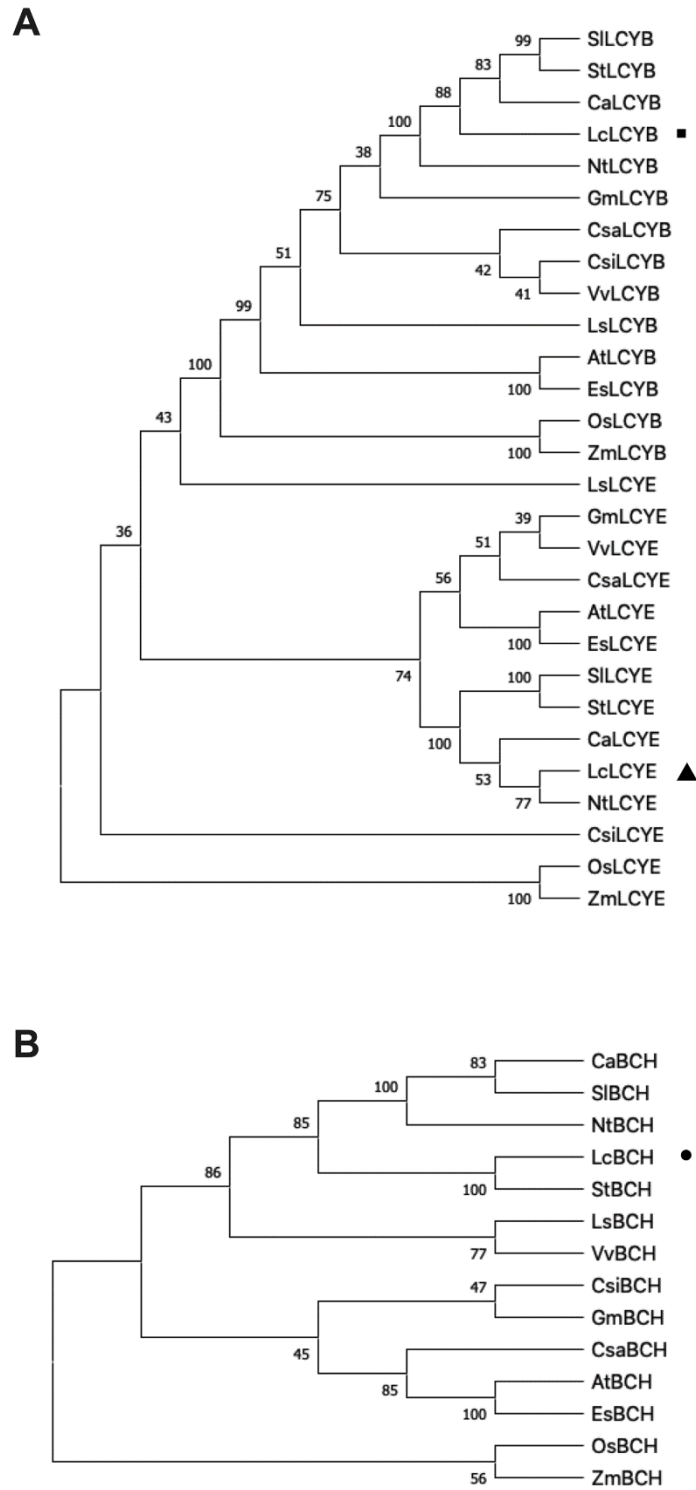

**Supplementary Figure 5.** Phylogenetic analysis of (A) LCYB and LCYE and (B) BCH were constructed using the Neighbor-Joining method with MEGA X software. The LcLCYB, LcLCYE, and LcBCH were indicated with ■, ▲ and ●, respectively.

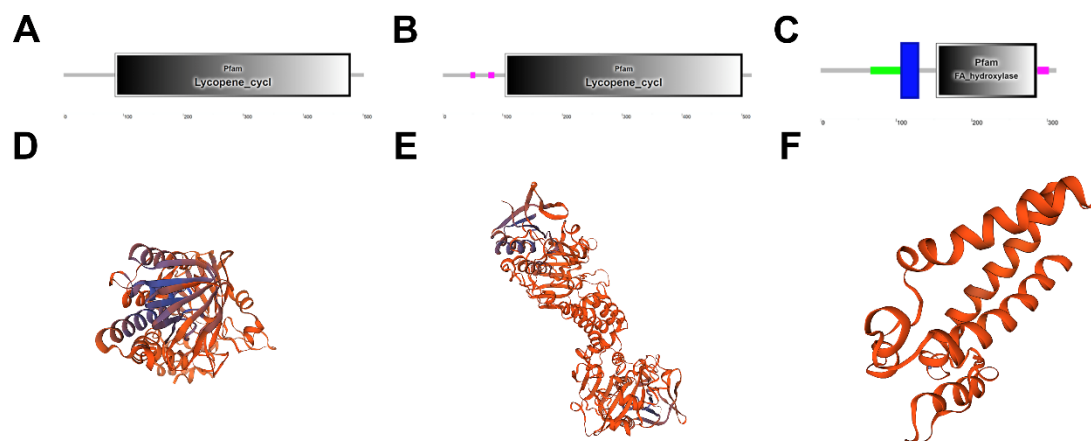

**Supplementary Figure 6.** Conserved domain analysis of (A) LcLCYB, (B) LcLCYE, and (C) LcBCH were accomplished with PFAM online tools (<http://pfam.xfam.org/>), and 3D structure prediction of (D) LcLCYB, (E) LcLCYE, and (F) LcBCH were applied with SWISS-MODEL Workspace (<https://swissmodel.expasy.org/>).

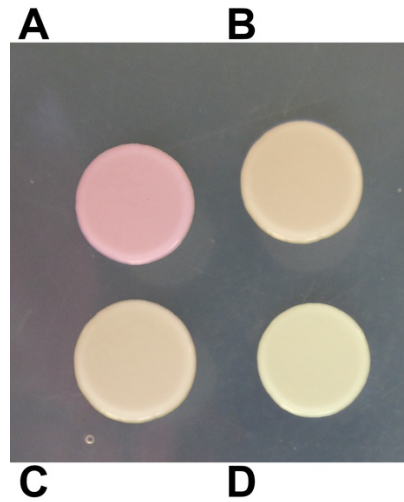

**Supplementary Figure 7.** The color complementation of *LcLCYB*, *LcLCYE*, and *LcBCH* in engineered *E.coli*. Recombined *E.coli* strains containing plasmid (A) pACCRT-*EBI* (carring genes coding geranylgeranyl diphosphate synthase, 15-cis-phytoene synthase, and phytoene desaturase), (B) pACCRT-*EBI* and pET-28a-*LcLCYB*, (C) pACCRT-*EBI* and pET-28a-*LcLCYE*, and (D) pACCRT-*EBI*, pET-28a-*LcLCYB* and pET-28a-*LcBCH* were displayed.

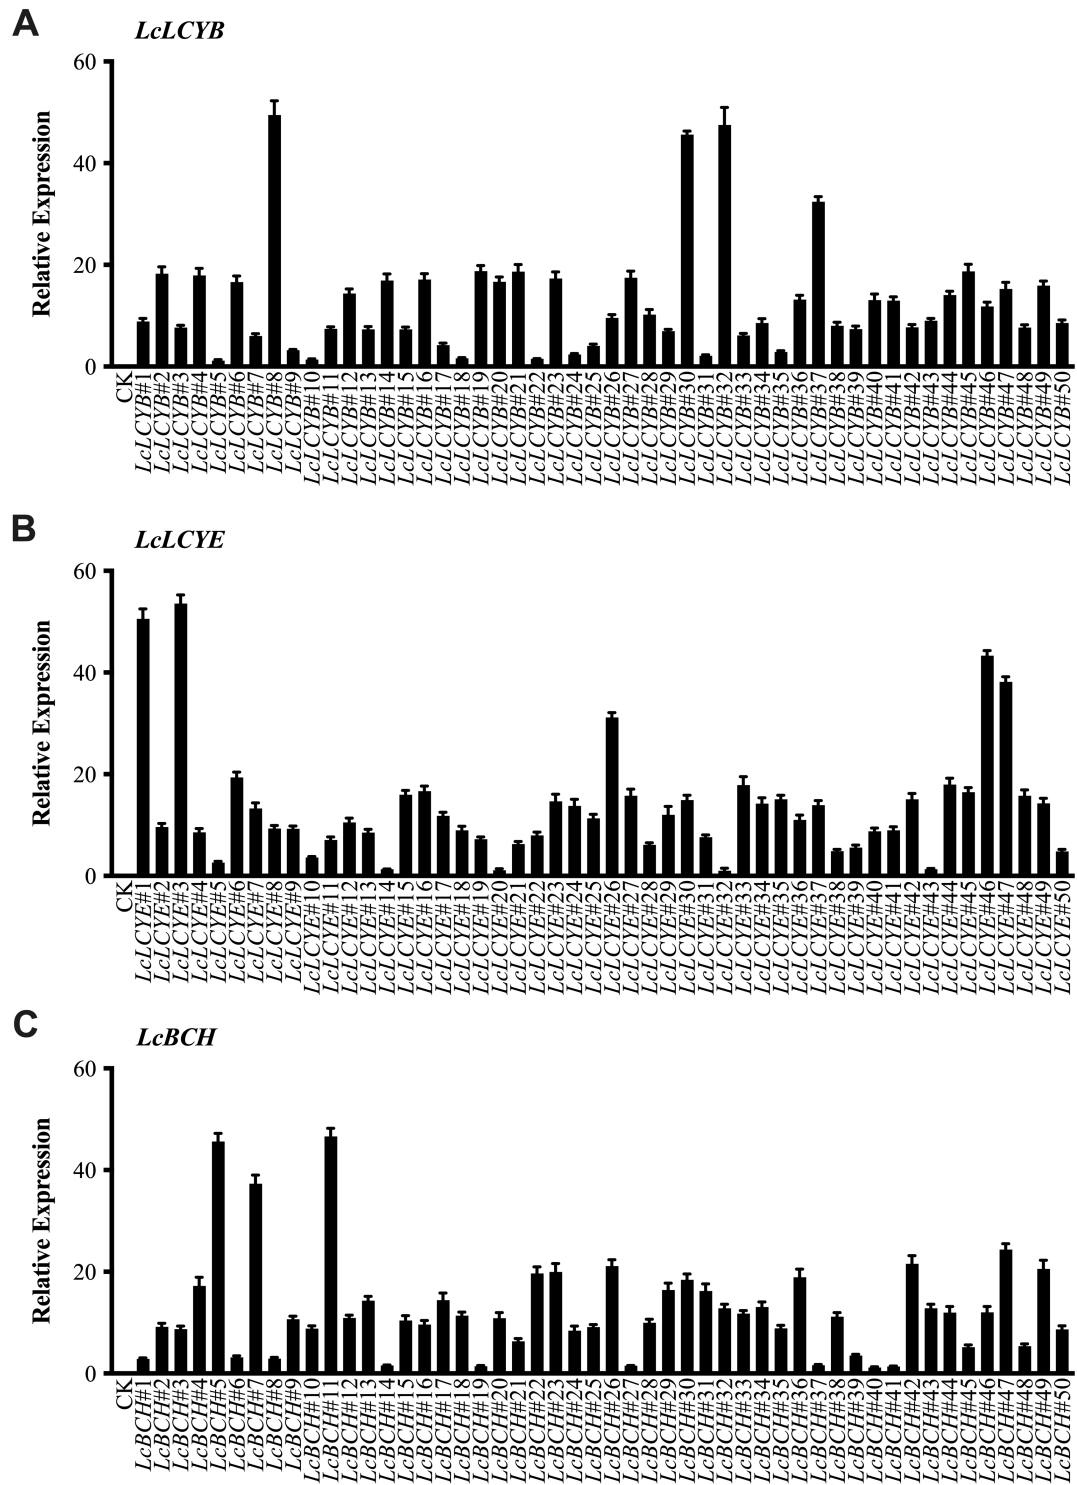

**Supplementary Figure 8.** Expression levels of (A) *LcLCYB*, (B) *LcLCYE*, and (C) *LcBCH* in transgenic tobaccos were measured by Real-time PCR, and results were normalized to reference gene *NtActin*. Tobacco overexpression lines were named as *Gene#Number*. Data were obtained from three independent experiments and performed as means  $\pm$  standard deviation.



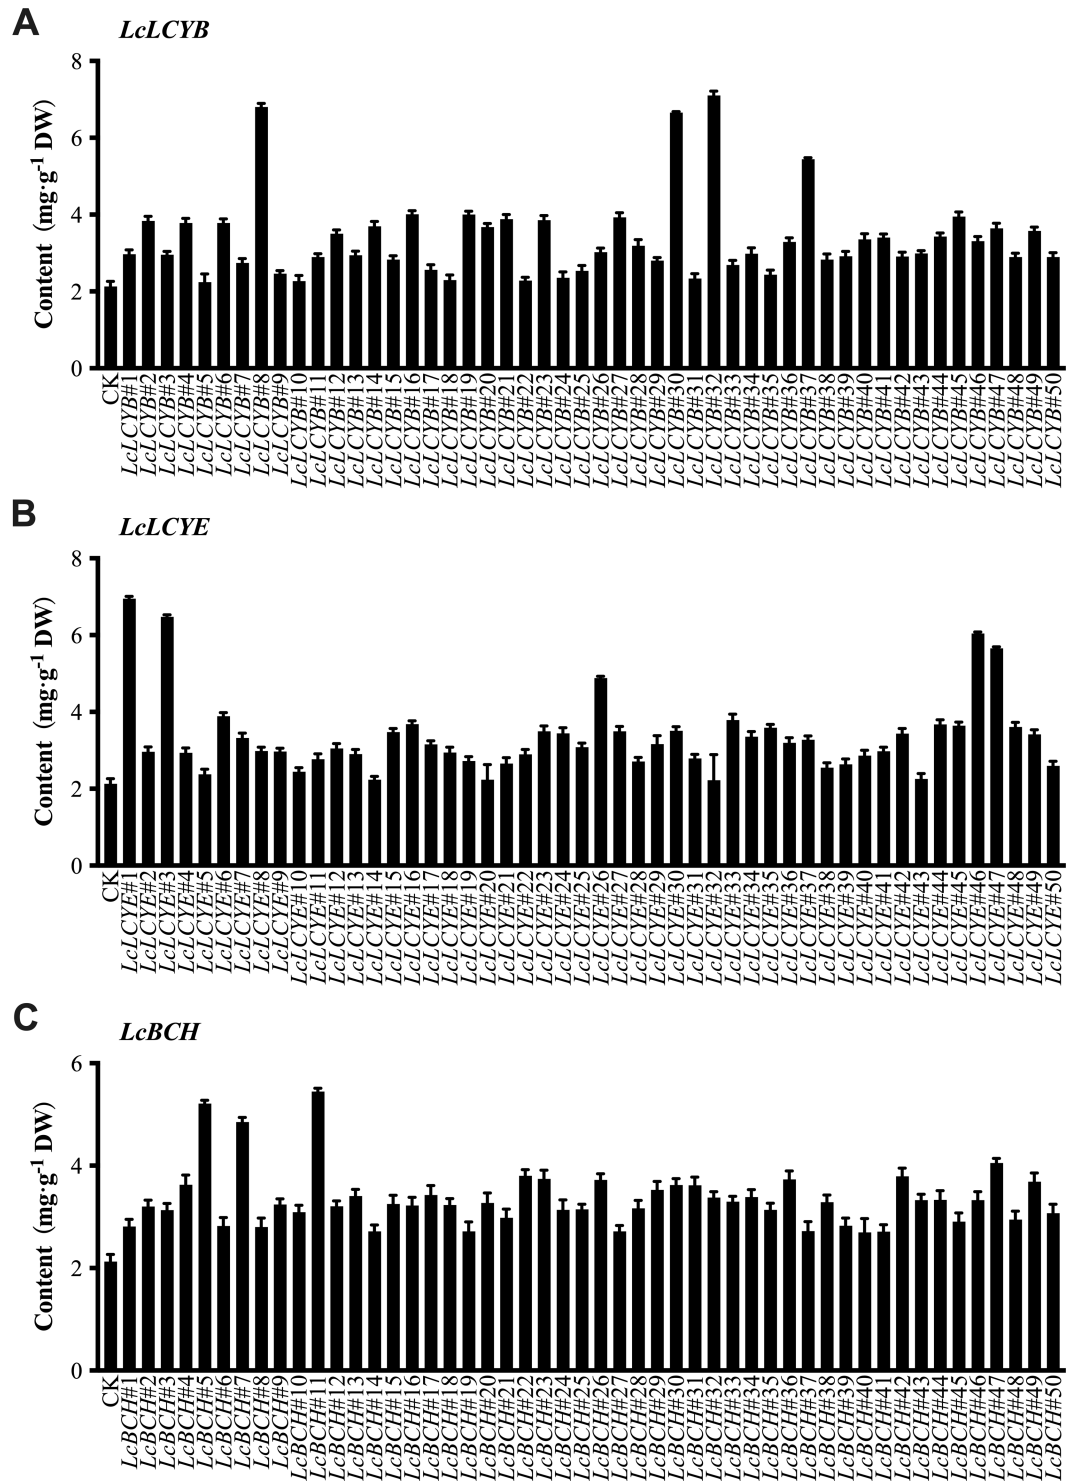

**Supplementary Figure 9.** Total carotenoid contents in (A) *LcLCYB*, (B) *LcLCYE*, and (C) *LcBCH* in transgenic tobacco leaves. Tobacco overexpression lines were named as *Gene#Number*. Data were obtained from three independent experiments and performed as means  $\pm$  standard deviation.

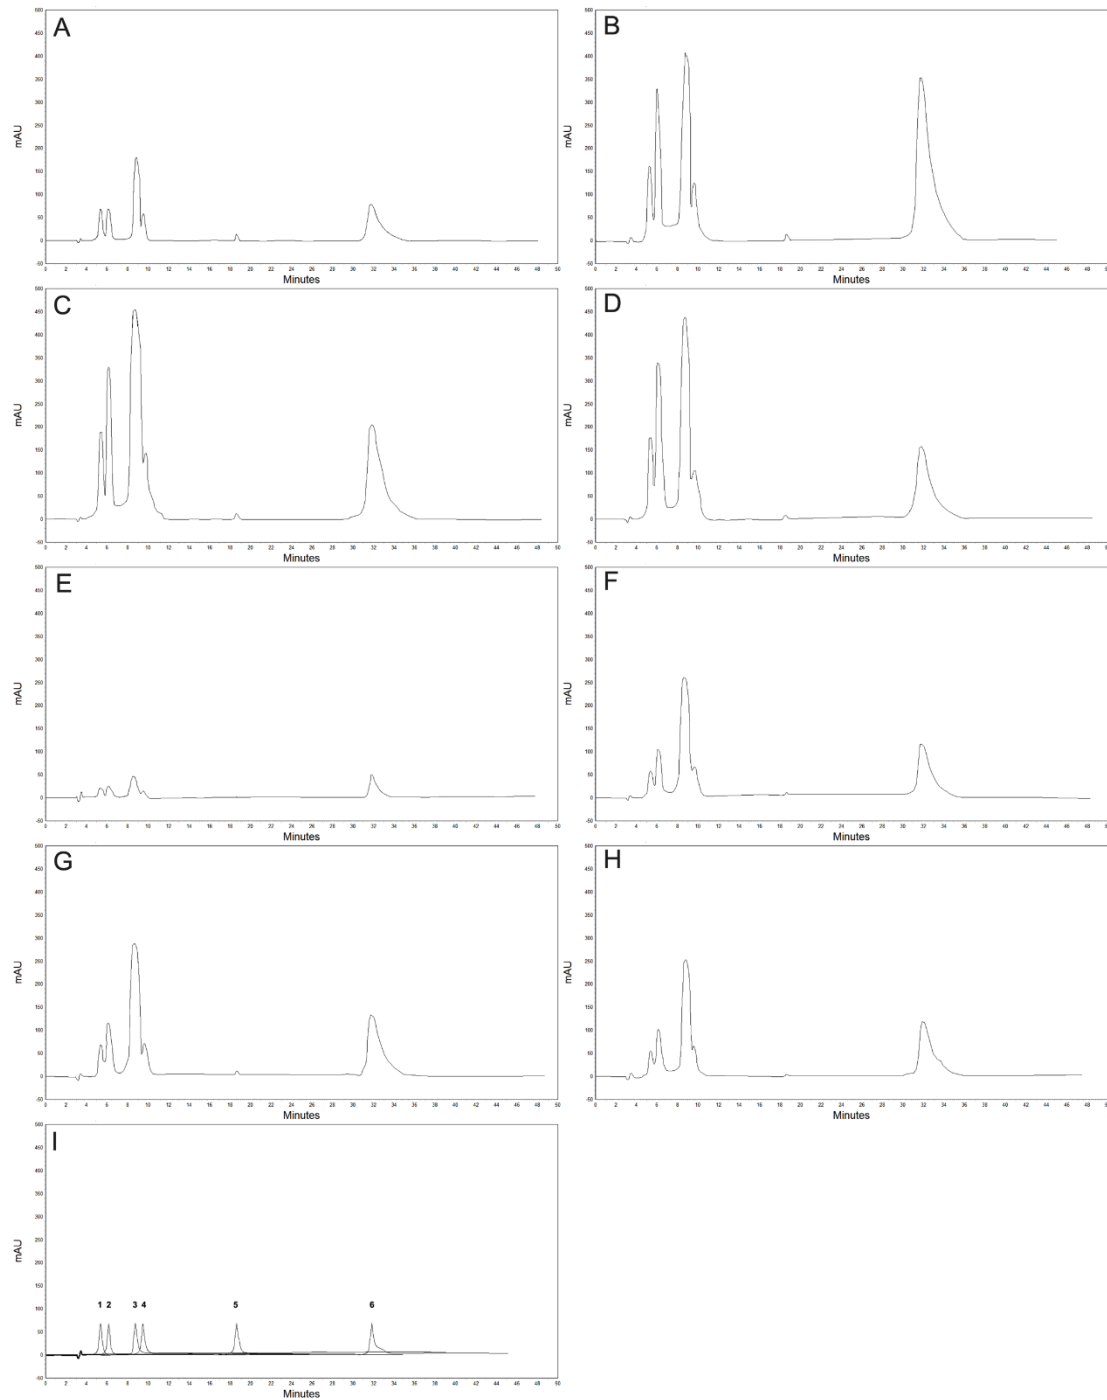

**Supplementary Figure 10.** The chromatogram figures of HPLC analysis. The chromatogram figures of (A) control plants and tobacco over-expressing (B) *LcLCYB*, (C) *LcLCYE*, and (D) *LcBCH* growing under normal condition; (E) control plants and tobacco over-expressing (F) *LcLCYB*, (G) *LcLCYE*, and (H) *LcBCH* growing under salt stress. The chromatogram figures of standard samples were shown in (I), and peaks labeled with numbers were standard samples of (1) neoxanthin, (2) violaxanthin, (3) lutein, (4) zeaxanthin, (5) lycopene, and (6)  $\beta$ -carotene.

**Supplementary Table 1.** Physicochemical properties and predicted subcellular localizations

| <b>Gene</b>   | <b>Accession No.</b> | <b>Length of ORF (bp)</b> | <b>Number of amino acids (aa)</b> | <b>Molecular weight (Da)</b> | <b>pI of protein</b> | <b>Predicted Subcellular location</b> |
|---------------|----------------------|---------------------------|-----------------------------------|------------------------------|----------------------|---------------------------------------|
| <i>LcLCYB</i> | KJ624406             | 1272                      | 423                               | 47807.6                      | 8.06                 | chloroplast                           |
| <i>LcLCYE</i> | KJ143993             | 1749                      | 582                               | 64949.0                      | 6.50                 | chloroplast                           |
| <i>LcBCH</i>  | KF430643             | 939                       | 312                               | 34850.3                      | 8.47                 | chloroplast                           |

**Supplementary Table 2.** Information of the protein for the sequence analysis

| <b>Protein</b> | <b>Species</b>              | <b>Accession number</b> |
|----------------|-----------------------------|-------------------------|
| AtBCH          | <i>Arabidopsis thaliana</i> | NP_200070               |
| CaBCH          | <i>Capsicum annuum</i>      | KAF3668875              |
| CsaBCH         | <i>Cucumis sativus</i>      | XP_004140758            |
| CsiBCH         | <i>Citrus sinensis</i>      | NP_001275830            |
| EsBCH          | <i>Eutrema salsugineum</i>  | XP_006413280            |
| GmBCH          | <i>Glycine max</i>          | NP_001242409            |
| LsBCH          | <i>Lactuca sativa</i>       | XP_023769464            |
| NtBCH          | <i>Nicotiana tabacum</i>    | NP_001313021            |
| OsBCH          | <i>Oryza sativa</i>         | XP_015628773            |
| SIBCH          | <i>Solanum lycopersicum</i> | NP_001234348            |
| StBCH          | <i>Solanum tuberosum</i>    | ADF28628                |
| VvBCH          | <i>Vitis vinifera</i>       | RVW41947                |
| ZmBCH          | <i>Zea mays</i>             | NP_001105865            |
| AtLCYB         | <i>Arabidopsis thaliana</i> | NP_187634               |
| CaLCYB         | <i>Capsicum annuum</i>      | PHT71462                |
| CsaLCYB        | <i>Cucumis sativus</i>      | XP_004150761            |
| CsiLCYB        | <i>Citrus sinensis</i>      | AAM21152                |
| EsLCYB         | <i>Eutrema salsugineum</i>  | XP_006407592            |
| GmLCYB         | <i>Glycine max</i>          | XP_003554132            |
| LsLCYB         | <i>Lactuca sativa</i>       | XP_023755637            |
| NtLCYB         | <i>Nicotiana tabacum</i>    | NP_001311716            |
| OsLCYB         | <i>Oryza sativa</i>         | XP_015627234            |
| SILCYB         | <i>Solanum lycopersicum</i> | XP_010312096            |
| StLCYB         | <i>Solanum tuberosum</i>    | XP_006351264            |
| VvLCYB         | <i>Vitis vinifera</i>       | XP_002275769            |
| ZmLCYB         | <i>Zea mays</i>             | NP_001169155            |
| AtLCYE         | <i>Arabidopsis thaliana</i> | NP_200513               |
| CaLCYE         | <i>Capsicum annuum</i>      | PHT73568                |
| CsaLCYE        | <i>Cucumis sativus</i>      | XP_004141172            |
| CsiLCYE        | <i>Citrus sinensis</i>      | AAS48096                |
| EsLCYE         | <i>Eutrema salsugineum</i>  | XP_006401252            |
| GmLCYE         | <i>Glycine max</i>          | XP_003533775            |
| LsLCYE         | <i>Lactuca sativa</i>       | XP_023756930            |
| NtLCYE         | <i>Nicotiana tabacum</i>    | XP_016467034            |
| OsLCYE         | <i>Oryza sativa</i>         | XP_015622198            |
| SILCYE         | <i>Solanum lycopersicum</i> | NP_001234337            |
| StLCYE         | <i>Solanum tuberosum</i>    | XP_006353544            |
| VvLCYE         | <i>Vitis vinifera</i>       | RVW43956                |
| ZmLCYE         | <i>Zea mays</i>             | AQK96213                |

**Supplementary Table 3.** Primers used for vector construction in this study

| <b>Gene</b>   | <b>Primer sequences for vector construction (5'-3')</b>                             |
|---------------|-------------------------------------------------------------------------------------|
| <i>LcLCYB</i> | F: ATCGGGATCCATGGATACTTTGTTGAAAACCCCAAATA<br>R: ATCGGTCGACTTATTCTGAATCCTGTAACAAATTG |
| <i>LcLCYE</i> | F: ATCGGGATCCATGGAATGTGTTGGAGTTCAAATTTTG<br>R: ATCGGTCGACTTAAAATGTAAGATAAGTTCTTATC  |
| <i>LcBCH</i>  | F: ATCGGGATCCATGGCTGCCGGAATTCAGGCATTG<br>R: ATCGGTCGACTCATAATCCCTTAGAAATTTAACT      |



**Supplementary Table 4.** Information of carotenoids analyzed with HPLC

| <b>Peak Number</b> | <b>Chemical Name</b> | <b>CAS Number</b> | <b>Retention Time<br/>(second)</b> |
|--------------------|----------------------|-------------------|------------------------------------|
| 1                  | neoxanthin           | 14660-91-4        | 322.37                             |
| 2                  | violaxanthin         | 126-29-4          | 369.71                             |
| 3                  | lutein               | 127-40-2          | 525.26                             |
| 4                  | zeaxanthin           | 144-68-3          | 570.35                             |
| 5                  | lycopene             | 502-65-8          | 1118.2                             |
| 6                  | $\beta$ -carotene    | 7235-40-7         | 1909.4                             |

**Supplementary Table 5.** Primers used for Real-time PCR in this study

| <b>Gene</b>     | <b>Primer Sequence (5'-3')</b>                          | <b>Accession number</b> |
|-----------------|---------------------------------------------------------|-------------------------|
| <i>NtActin</i>  | F: CCTGAGGTCCTTTTCCAACCA<br>R: GGATTCCGGCAGCTTCCATT     | XM_016658252.1          |
| <i>NtIPI</i>    | F: AAGAGCATTGAAGAGGACGAG<br>R: AACAATGACCAATAACTCCAGGC  | NM_001326211.1          |
| <i>NtGGPS</i>   | F: CTGTCAATCGAGCCTTAGATGC<br>R: AAACCCGCTTGCCTTCG       | NM_001325671.1          |
| <i>NtPSY</i>    | F: TGTTGCTTTGTTGTGGGTTG<br>R: TTTGTCTCCCGCCTTTCA        | NM_001325140.1          |
| <i>NtPDS</i>    | F: AGTCAGACTAAACTCACGAATAAA<br>R: CTCCCCTAGCTTCTCCAA    | XM_016642616.1          |
| <i>NtZDS</i>    | F: GGGAGCTTGATTTCCGATT<br>R: CCCGCACCACTGGACTAA         | XM_016658599.1          |
| <i>NtCRTISO</i> | F: GCAGGACCAGATTCAGCG<br>R: GATGGATAAAGGAGGTAGAGCC      | NM_001325775.1          |
| <i>NtLCYB</i>   | F: AAGAGCATTGAAGAGGACGAG<br>R: TGAGGGATGAACCAGACCAG     | NM_001324787.1          |
| <i>NtLCYE</i>   | F: GCTCTTGCTGCGGAGTC<br>R: GAATTGGATCGGCATCGT           | NM_001325477.1          |
| <i>NtBCH</i>    | F: CTTGGCAAATGGAGGGTG<br>R: AAGAAGAGCAATGGCTGGAA        | NM_001326092.1          |
| <i>NtVDE</i>    | F: CTGAAAGAGTGCAGGTTAGAGC<br>R: TGGAGACAGGCAACATTAGC    | NM_001324805.1          |
| <i>NtZEP</i>    | F: CAACAGCAGAACTGAGCCAT<br>R: AACAATGACCAATAACTCCAGGC   | XM_016582459.1          |
| <i>NtNSY</i>    | F: AAGCCAAAGTAGGTGCCCAA<br>R: AACGGTAAGATGGAGAATGGCT    | XM_016625496.1          |
| <i>NtAPX</i>    | F: GGAAGAGTTGGGAGTGGTGG<br>R: ACAGCTGCCAAATTCAAATCCT    | NM_001324874.1          |
| <i>NtCAT</i>    | F: GTCTTGACAGGAAGGCGTGA<br>R: AACGGAAGACAGAGTAGCAGC     | NM_001325412            |
| <i>NtP5CR</i>   | F: AAGAGCGTGGCACAATCACT<br>R: AGCTTTTCTCGAGTTTCTTCTGC   | XM_016610055.1          |
| <i>NtPOD</i>    | F: GGACAAATGGAGAGATTCGTTTCAG<br>R: TGCTGACTTGGCCTACCAAC | XM_016632447.1          |
| <i>NtSOD</i>    | F: TCCTCCCCAGGTTTCGGAATA<br>R: TGCGCTACATTTGGCAAGAG     | XM_016631233.1          |
| <i>LcLCYB</i>   | F: ACATCCCTTG TAGCTCGTCCTGG<br>R: ACCATGCCAGCAGTACCACCA | KP262047.1              |
| <i>LcLCYE</i>   | F: AACGTTGGGCTCGTTGGGCCT<br>R: CTCCTCGTGCAGTAAATGGCGACT | KF768738.2              |

*LcBCH*

F: AGGCTGGCGGAAAAATTGGCGA

R: GCAGCGCCAAACGAGAGAGCGA

---

KF430643.1
